# Supplementary material for: Phenotypic and Genotypic Characterization and Correlation Analysis of Pea (Pisum sativum L.) Diversity Panel
Source: MDPI journal article supplement (doi:10.3390/plants11101321), 2022-05-16
Supplement: s1 [file s1]

**Table S1:** Meteorological conditions in Novi Sad, Serbia during the vegetation seasons of pea in 2019 and 2020, and long-term average temperatures

| Temperature (°C) |             |             |                   | Precipitation (mm) |             |             |                   |
|------------------|-------------|-------------|-------------------|--------------------|-------------|-------------|-------------------|
| Month            | Year        |             | Long-term average | Month              | Year        |             | Long-term average |
|                  | 2019        | 2020        |                   |                    | 2019        | 2020        |                   |
| <b>I</b>         | 0.1         | 0.6         | 0.5               | <b>I</b>           | 42          | 23          | 40                |
| <b>II</b>        | 4.9         | 7.2         | 1.7               | <b>II</b>          | 16          | 46          | 33                |
| <b>III</b>       | 10.1        | 8.8         | 6.4               | <b>III</b>         | 18          | 55          | 42                |
| <b>IV</b>        | 14.6        | 12.6        | 11.9              | <b>IV</b>          | 54          | 12          | 48                |
| <b>V</b>         | 14.9        | 16.1        | 17.2              | <b>V</b>           | 147         | 48          | 73                |
| <b>VI</b>        | 22.8        | 20.9        | 20.2              | <b>VI</b>          | 64          | 163         | 23                |
| <b>VII</b>       | 22.7        | 22.8        | 22.1              | <b>VII</b>         | 22          | 76          | 64                |
| <b>Average</b>   | <b>12.9</b> | <b>12.7</b> | <b>11.4</b>       | <b>Average</b>     | <b>51.8</b> | <b>60.4</b> | <b>46.1</b>       |

**Table S2:** Meteorological conditions in Kessenich, Belgium during the vegetation seasons of pea in 2019 and 2020, and long-term average temperatures

| Temperature (°C) |             |             |                   | Precipitation (mm) |             |             |                   |
|------------------|-------------|-------------|-------------------|--------------------|-------------|-------------|-------------------|
| Month            | Year        |             | Long-term average | Month              | Year        |             | Long-term average |
|                  | 2019        | 2020        |                   |                    | 2019        | 2020        |                   |
| <b>I</b>         | 1.6         | 4.5         | 2.1               | <b>I</b>           | 0.35        | 0.35        | 0.28              |
| <b>II</b>        | 5.3         | 6.3         | 2.8               | <b>II</b>          | 0.29        | 0.48        | 0.29              |
| <b>III</b>       | 7.8         | 6.1         | 5.8               | <b>III</b>         | 0.35        | 0.35        | 0.29              |
| <b>IV</b>        | 10.7        | 11.6        | 9.9               | <b>IV</b>          | 0.33        | 0.35        | 0.27              |
| <b>V</b>         | 12.2        | 13.4        | 13.7              | <b>V</b>           | 0.35        | 0.35        | 0.29              |
| <b>VI</b>        | 19.8        | 17.9        | 17.1              | <b>VI</b>          | 0.44        | 0.35        | 0.30              |
| <b>VII</b>       | 20.5        | 18.5        | 19.1              | <b>VII</b>         | 0.35        | 0.36        | 0.30              |
| <b>Average</b>   | <b>11.1</b> | <b>11.2</b> | <b>10.1</b>       | <b>Average</b>     | <b>0.35</b> | <b>0.37</b> | <b>0.29</b>       |

**Table S3.** Pearson's correlation coefficient (r) for analyzed traits between two years (2019 and 2020)

| Trait      | Serbia  | Belgium |
|------------|---------|---------|
|            | r       | r       |
| <b>GPP</b> | 0.60*** | 0,98    |
| <b>PPP</b> | 0.44*** | 0,40*** |
| <b>SPP</b> | 0.45*** | 0,28*** |
| <b>FL</b>  | 0.13    | 0,10*** |
| <b>PH</b>  | 0.77*** | 0,82*** |
| <b>PL</b>  | 0.46*** | 0,68*** |
| <b>PoL</b> | 0.75*** | 0,61*** |
| <b>TSW</b> | 0.92*** | 0,80*** |

|             |         |         |
|-------------|---------|---------|
| <b>SWPP</b> | 0.48*** | 0,42*** |
| <b>SY</b>   | 0,74*** | 0,73*** |
| <b>PC</b>   | 0,27*** | 0,17*** |

Significant at  $p \leq 0.001$ (\*\*\*)

**Table S4:** The list of pea genotypes analysed in the study

| Eucleg no  | Accession name | Accession Number | Population type * | Country of origin | Variety type by usage | Gen collection** |
|------------|----------------|------------------|-------------------|-------------------|-----------------------|------------------|
| EUC_PS_001 | 00-10          | 00-10            | BL                | North America     | Dry                   | ASR              |
| EUC_PS_002 | 00-11          | 00-11            | BL                | North America     | Dry                   | ASR              |
| EUC_PS_003 | 00-2060        | 00-2060          | BL                | North America     | Dry                   | ASR              |
| EUC_PS_004 | 00-2061        | 00-2061          | BL                | North America     | Garden                | ASR              |
| EUC_PS_005 | 00-2062        | 00-2062          | BL                | North America     | Dry                   | ASR              |
| EUC_PS_006 | 00-2063        | 00-2063          | BL                | North America     | Garden                | ASR              |
| EUC_PS_007 | 00-2064        | 00-2064          | BL                | North America     | Dry                   | ASR              |
| EUC_PS_008 | 00-2066        | 00-2066          | BL                | North America     | Garden                | ASR              |
| EUC_PS_009 | 00-2067        | 00-2067          | BL                | North America     | Dry                   | ASR              |
| EUC_PS_010 | 00-2068        | 00-2068          | BL                | North America     | Dry                   | ASR              |
| EUC_PS_011 | 00-2069        | 00-2069          | BL                | North America     | Dry                   | ASR              |
| EUC_PS_012 | 00-2071-2      | 00-2071-2        | BL                | North America     | Garden                | ASR              |
| EUC_PS_013 | 00-2072        | 00-2072          | BL                | North America     | Dry                   | ASR              |
| EUC_PS_014 | 00-2073        | 00-2073          | BL                | North America     | Garden                | ASR              |
| EUC_PS_015 | 00-2084        | 00-2084          | BL                | North America     | Dry                   | ASR              |
| EUC_PS_016 | 00-2086        | 00-2086          | BL                | North America     | Garden                | ASR              |
| EUC_PS_017 | 00-2087        | 00-2087          | BL                | North America     | Garden                | ASR              |
| EUC_PS_018 | 00-2091        | 00-2091          | BL                | North America     | Dry                   | ASR              |
| EUC_PS_019 | 00-2100        | 00-2100          | BL                | North America     | Dry                   | ASR              |
| EUC_PS_020 | 00-2103        | 00-2103          | BL                | North America     | Dry                   | ASR              |
| EUC_PS_021 | 00-2106        | 00-2106          | BL                | North America     | Dry                   | ASR              |
| EUC_PS_022 | 00-2122        | 00-2122          | BL                | North America     | Dry                   | ASR              |
| EUC_PS_023 | 00-2177        | 00-2177          | BL                | North America     | Dry                   | ASR              |

|            |             |             |    |               |               |     |
|------------|-------------|-------------|----|---------------|---------------|-----|
| EUC_PS_024 | 00-7        | 00-7        | BL | North America | Garden        | ASR |
| EUC_PS_025 | 03PP054.46  | 03PP054.46  | V  | Australia     | Dry           | ASR |
| EUC_PS_026 | 171-11001   | 171-11001   | BL | North America | Forage        | ASR |
| EUC_PS_027 | AP18        | AP18        | V  | North America | Forage        | ASR |
| EUC_PS_028 | AP2         | AP2         | V  | North America | Forage        | ASR |
| EUC_PS_029 | Ariel       | Ariel       | V  | New Zealand   | Dry           | ASR |
| EUC_PS_030 | Banner      | Banner      | V  | North America | Dry           | ASR |
| EUC_PS_031 | Columbia    | Columbia    | V  | North America | Dry           | ASR |
| EUC_PS_032 | Courier     | Courier     | V  | North America | Dry           | ASR |
| EUC_PS_033 | Cruiser     | Cruiser     | V  | North America | Dry           | ASR |
| EUC_PS_034 | Ginny       | Ginny       | V  | North America | Dry           | ASR |
| EUC_PS_035 | H3-2        | H3-2        | V  | North America | Forage        | ASR |
| EUC_PS_036 | hyline      | hyline      | V  | North America | Dry           | ASR |
| EUC_PS_037 | icicle      | icicle      | V  | North America | Forage        | ASR |
| EUC_PS_038 | Journey     | Journey     | V  | North America | Forage        | ASR |
| EUC_PS_039 | Koyote      | Koyote      | V  | North America | Winter dry    | ASR |
| EUC_PS_040 | Monarch     | Monarch     | V  | North America | Dry           | ASR |
| EUC_PS_041 | Pacifica    | Pacifica    | V  | North America | Dry           | ASR |
| EUC_PS_042 | PRL 6254    | PRL 6254    | V  | New Zealand   | Dry           | ASR |
| EUC_PS_043 | Pro 6243    | Pro 6243    | V  | North America | Dry           | ASR |
| EUC_PS_044 | Pro 7123    | Pro 7123    | V  | North America | Dry           | ASR |
| EUC_PS_045 | Pro 7127    | Pro 7127    | V  | North America | Dry           | ASR |
| EUC_PS_046 | Pro 7405    | Pro 7405    | V  | North America | Dry           | ASR |
| EUC_PS_047 | Pro 7410    | Pro 7410    | V  | North America | Dry           | ASR |
| EUC_PS_048 | Pro 822     | Pro 822     | V  | North America | Dry           | ASR |
| EUC_PS_049 | Pro101-7133 | Pro101-7133 | V  | North America | Dry           | ASR |
| EUC_PS_050 | Whero       | Whero       | V  | North America | Dry           | ASR |
| EUC_PS_051 | Whistler    | Whistler    | V  | North America | Winter forage | ASR |
| EUC_PS_052 | Yarrum      | Yarrum      | V  | Australia     | Dry           | ASR |
| EUC_PS_053 | ASR 4064    | ASR 4064    | V  | Belgium       | Garden        | ASR |

|            |                  |          |    |                |            |          |
|------------|------------------|----------|----|----------------|------------|----------|
| EUC_PS_054 | ASR 4027         | ASR 4027 | V  | Belgium        | Garden     | ASR      |
| EUC_PS_055 | ASR 4139         | ASR 4139 | V  | Belgium        | Garden     | ASR      |
| EUC_PS_056 | ASR 4150         | ASR 4150 | V  | Belgium        | Garden     | ASR      |
| EUC_PS_057 | ASR 4134         | ASR 4134 | V  | Belgium        | Garden     | ASR      |
| EUC_PS_058 | JI 2713          | JI2713   | SW | Russia         | Wild       | IBERS    |
| EUC_PS_059 | JI 2546          | JI2546   | W  | Georgia        | Wild       | IBERS    |
| EUC_PS_060 | JI 201           | JI0201   | W  | Italy          | Wild       | IBERS    |
| EUC_PS_061 | JI 1346          | JI1346   | L  | Mongolia       | Landrace   | IBERS    |
| EUC_PS_062 | JI 2545          | JI2545   | L  | Netherlands    | Landrace   | IBERS    |
| EUC_PS_063 | JI 3541          | JI3541   | BL | India          | Sugar snap | IBERS    |
| EUC_PS_065 | JI 1478          | JI1478   | L  | Afganistan     | Landrace   | IBERS    |
| EUC_PS_066 | JI 778           | JI0778   | BL | North America  | Dry        | IBERS    |
| EUC_PS_067 | JI 3022          | JI3022   | GS | Russia         | Dry        | IBERS    |
| EUC_PS_068 | JI 1482          | JI1482   | L  | Afganistan     | Landrace   | IBERS    |
| EUC_PS_069 | JI 1124          | JI1124   | L  | Nepal          | Landrace   | IBERS    |
| EUC_PS_110 | Campus           | Campus   | V  | Denmark        | Dry        | IBERS    |
| EUC_PS_111 | Kareni           | Kareni   | V  | France         | Dry        | IBERS    |
| EUC_PS_112 | Mascara          | Mascara  | V  | Denmark        | Dry        | IBERS    |
| EUC_PS_113 | Sakura           | Sakura   | V  | United Kingdom | Marrowfat  | IBERS    |
| EUC_PS_114 | JULITA           | NGB9927  | L  | Sweden         | Sugar pea  | NorthGen |
| EUC_PS_117 | BLÅ ÄRTER 1      | NGB11727 | L  | Sweden         | Dry        | NorthGen |
| EUC_PS_118 | BLÅÄRT 2         | NGB11735 | L  | Sweden         | Dry        | NorthGen |
| EUC_PS_120 | VIDEMOSEÄRT      | NGB11759 | L  | Denmark        | Garden     | NorthGen |
| EUC_PS_121 | GOTLÄNDSK BLÅÄRT | NGB11760 | L  | Sweden         | Dry        | NorthGen |
| EUC_PS_126 | SKÅNSK GRÅÄRT    | NGB14155 | L  | Sweden         | Dry        | NorthGen |
| EUC_PS_129 | BOHUSÄRT         | NGB14637 | L  | Sweden         | Dry        | NorthGen |
| EUC_PS_130 | SÖRMLÄNSK BÖNÄRT | NGB14640 | L  | Sweden         | Dry        | NorthGen |
| EUC_PS_131 | LIT              | NGB14642 | L  | Sweden         | Dry        | NorthGen |
| EUC_PS_145 | ALFTA            | NGB17867 | L  | Sweden         | Dry/garden | NorthGen |
| EUC_PS_146 | VÄSE             | NGB17868 | L  | Sweden         | Dry        | NorthGen |
| EUC_PS_147 | VISINGSÖ         | NGB17870 | L  | Sweden         | Dry        | NorthGen |
| EUC_PS_148 | Tjörn            | NGB18053 | L  | Sweden         | Dry        | NorthGen |
| EUC_PS_153 | SPARLÖSA GRÅÄRT  | NGB20190 | L  | Sweden         | Dry        | NorthGen |
| EUC_PS_154 | HISINGS GRÅÄRT   | NGB20192 | L  | Sweden         | Dry        | NorthGen |
| EUC_PS_155 | TJÖRN från SESAM | NGB21238 | L  | Sweden         | Garden     | NorthGen |
| EUC_PS_156 | RABER            | NGB22830 | L  | Sweden         | Garden     | NorthGen |

|            |                |           |    |        |            |          |
|------------|----------------|-----------|----|--------|------------|----------|
| EUC_PS_162 | WBH 1304       | NGB101304 | BL | Sweden | Dry        | NorthGen |
| EUC_PS_163 | Marieholm      | NGB101818 | L  | Sweden | Dry        | NorthGen |
| EUC_PS_165 | WBH 1846       | NGB101846 | L  | Greece | Garden     | NorthGen |
| EUC_PS_169 | Smolenskij 812 | NGB101987 | BL | Russia | Garden     | NorthGen |
| EUC_PS_170 | Brioärt        | NGB101997 | V  | Sweden | Forage     | NorthGen |
| EUC_PS_172 | Gråärt         | NGB103590 | L  | Sweden | Dry        | NorthGen |
| EUC_PS_176 | G32            | G32       | BL | Serbia | Dry        | IFVCNS   |
| EUC_PS_177 | G28            | G28       | BL | Serbia | Dry        | IFVCNS   |
| EUC_PS_181 | G12            | G12       | BL | Serbia | Dry        | IFVCNS   |
| EUC_PS_182 | TR             | TR        | V  | Serbia | Forage/dry | IFVCNS   |
| EUC_PS_183 | JZ             | JZ        | V  | Serbia | Dry        | IFVCNS   |
| EUC_PS_184 | PR             | PR        | V  | Serbia | Dry        | IFVCNS   |
| EUC_PS_185 | L - 15/4       | L-15/4    | BL | Serbia | Forage/dry | IFVCNS   |
| EUC_PS_186 | JV             | JV        | V  | Serbia | Dry        | IFVCNS   |
| EUC_PS_188 | SEP4           | SEP4      | BL | Serbia | Dry        | IFVCNS   |
| EUC_PS_189 | SEP5           | SEP5      | BL | Serbia | Dry        | IFVCNS   |
| EUC_PS_190 | SEP8           | SEP8      | BL | Serbia | Dry        | IFVCNS   |
| EUC_PS_191 | SEP9           | SEP9      | BL | Serbia | Dry        | IFVCNS   |
| EUC_PS_192 | SEP10          | SEP10     | BL | Serbia | Dry        | IFVCNS   |
| EUC_PS_193 | SEP11          | SEP11     | BL | Serbia | Dry        | IFVCNS   |
| EUC_PS_194 | SEP14          | SEP14     | BL | Serbia | Dry        | IFVCNS   |
| EUC_PS_196 | G47            | G47       | BL | Serbia | Dry        | IFVCNS   |
| EUC_PS_198 | A7Z            | A7Z       | BL | Serbia | Dry        | IFVCNS   |
| EUC_PS_199 | A15 Z          | A15Z      | BL | Serbia | Dry        | IFVCNS   |
| EUC_PS_200 | K1- 18         | K1-18     | BL | Serbia | Dry        | IFVCNS   |
| EUC_PS_201 | K2- 18         | K2-18     | BL | Serbia | Dry        | IFVCNS   |
| EUC_PS_202 | G42            | G42       | BL | Serbia | Forage/dry | IFVCNS   |
| EUC_PS_203 | G14            | G14       | BL | Serbia | Forage/dry | IFVCNS   |
| EUC_PS_206 | G49            | G49       | BL | Serbia | Dry        | IFVCNS   |
| EUC_PS_207 | PIS 054        | PIS054    | BL | Serbia | Forage     | IFVCNS   |
| EUC_PS_208 | PIS 179        | PIS179    | BL | Serbia | Forage     | IFVCNS   |
| EUC_PS_209 | PIS 183        | PIS183    | BL | Serbia | Forage/dry | IFVCNS   |
| EUC_PS_210 | PIS 184        | PIS184    | BL | Serbia | Forage     | IFVCNS   |
| EUC_PS_211 | PIS 067        | PIS067    | BL | Serbia | Forage     | IFVCNS   |
| EUC_PS_212 | HR 2           | HR2       | V  | Serbia | Forage     | IFVCNS   |
| EUC_PS_213 | KZ5            | KZ5       | BL | Serbia | Dry        | IFVCNS   |

|            |             |             |    |               |            |        |
|------------|-------------|-------------|----|---------------|------------|--------|
| EUC_PS_214 | KZ6         | KZ6         | BL | Serbia        | Dry        | IFVCNS |
| EUC_PS_215 | G - K       | G-K         | BL | Serbia        | Dry        | IFVCNS |
| EUC_PS_216 | G - Dž      | G-Dž        | BL | Serbia        | Dry        | IFVCNS |
| EUC_PS_217 | G - F       | G-F         | BL | Serbia        | Dry        | IFVCNS |
| EUC_PS_218 | K - TM      | K-TM        | BL | Serbia        | Dry        | IFVCNS |
| EUC_PS_219 | K - MPR     | K-MPR       | BL | Serbia        | Dry        | IFVCNS |
| EUC_PS_220 | Ob TR       | ObTR        | BL | Serbia        | Forage/dry | IFVCNS |
| EUC_PS_221 | Ob KR/2     | ObKR/2      | BL | Serbia        | Dry        | IFVCNS |
| EUC_PS_222 | Ob K2/1     | ObK2/1      | BL | Serbia        | Dry        | IFVCNS |
| EUC_PS_223 | Ob K3/1     | ObK3/1      | BL | Serbia        | Dry        | IFVCNS |
| EUC_PS_224 | A14Z        | A14Z        | BL | Serbia        | Dry        | IFVCNS |
| EUC_PS_225 | A2Z         | A2Z         | BL | Serbia        | Dry        | IFVCNS |
| EUC_PS_226 | A8Z         | A8Z         | BL | Serbia        | Dry        | IFVCNS |
| EUC_PS_227 | G-ČA-O      | G-ČA-O      | BL | Serbia        | Dry        | IFVCNS |
| EUC_PS_228 | SEP140      | SEP140      | BL | Serbia        | Dry        | IFVCNS |
| EUC_PS_229 | ObK1/1      | ObK1/1      | BL | Serbia        | Dry        | IFVCNS |
| EUC_PS_230 | PI - 1      | PI-1        | V  | Serbia        | Forage     | IFVCNS |
| EUC_PS_231 | Ob L2       | ObL2        | BL | Serbia        | Dry        | IFVCNS |
| EUC_PS_232 | Ob L3       | ObL3        | BL | Serbia        | Dry        | IFVCNS |
| EUC_PS_233 | Ob L6       | ObL6        | BL | Serbia        | Dry        | IFVCNS |
| EUC_PS_234 | PIS178      | PIS178      | BL | Serbia        | Forage     | IFVCNS |
| EUC_PS_241 | Aragorn     | Aragorn     | V  | North America | Dry        | ASR    |
| EUC_PS_242 | Flex        | Flex        | V  | North America | Forage     | ASR    |
| EUC_PS_243 | Greenwood   | Greenwood   | V  | North America | Dry        | ASR    |
| EUC_PS_244 | Kayanne     | Kayanne     | V  | Denmark       | Dry        | ASR    |
| EUC_PS_245 | Solido      | Solido      | V  | Netherlands   | Marrowfat  | ASR    |
| EUC_PS_246 | yellowstone | yellowstone | V  | North America | Dry        | ASR    |
| EUC_PS_247 | KARAT       | KARAT       | V  | Serbia        | Dry        | IFVCNS |
| EUC_PS_248 | PARTNER     | PARTNER     | V  | Serbia        | Dry        | IFVCNS |
| EUC_PS_249 | DUKAT       | DUKAT       | V  | Serbia        | Dry        | IFVCNS |
| EUC_PS_250 | JUNIOR      | JUNIOR      | V  | Serbia        | Forage     | IFVCNS |
| EUC_PS_252 | A10Z**      | A10Z**      | BL | Serbia        | Dry        | IFVCNS |
| EUC_PS_253 | KOSMAJ      | KOSMAJ      | V  | Serbia        | Forage     | IFVCNS |
| EUC_PS_254 | Mak 116     | Mak116      | V  | Serbia        | Dry        | IFVCNS |
| EUC_PS_255 | UKR 015A    | UKR015A     | V  | Serbia        | Dry        | IFVCNS |
| EUC_PS_256 | UKR 133S    | UKR133S     | V  | Serbia        | Dry        | IFVCNS |

|                   |          |         |   |        |     |        |
|-------------------|----------|---------|---|--------|-----|--------|
| <b>EUC_PS_257</b> | UKR 223A | UKR223A | V | Serbia | Dry | IFVCNS |
| <b>EUC_PS_258</b> | UKR 138S | UKR138S | V | Serbia | Dry | IFVCNS |
| <b>EUC_PS_259</b> | UKR 101I | UKR101I | V | Serbia | Dry | IFVCNS |
| <b>EUC_PS_260</b> | UKR 134G | UKR134G | V | Serbia | Dry | IFVCNS |

\* BL—breeding Line; V—variety; SW—semi-wild; W—wild; L—landrace; GS—genetic stock.

\*\* ASR—Agro Seed Research, Kessenich; IBERS—Institute of Biological, Environmental and Rural Sciences, Aberystwyth;  
NorthGen—NorthGen Genetic Resource Center, Alnarp; IFVCNS—Institute of Field and Vegetable Crops, Novi Sad
